# Supplementary material for: Lys63-linked ubiquitin chain adopts multiple conformational states for specific target recognition
Source: eLife journal article supplement (doi:10.7554/elife.05767), 2015-06-19
Supplement: supp [file elife-05767-supp-v1.zip]

Archive with 17 entries (17 files):
- elife_poa_e05767_Figure_1_figure_supplement_8.pdf
- elife_poa_e05767_Figure_5_figure_supplement_1.pdf
- elife_poa_e05767_Figure_3_figure_supplement_1.pdf
- elife_poa_e05767_Figure_1_figure_supplement_1.pdf
- elife_poa_e05767_Figure_1_figure_supplement_4.pdf
- elife_poa_e05767_Figure_2_figure_supplement_2.pdf
- elife_poa_e05767_Figure_1_figure_supplement_2.pdf
- elife_poa_e05767_Figure_1_figure_supplement_3.pdf
- elife_poa_e05767_Figure_4_figure_supplement_2.pdf
- elife_poa_e05767_Figure_1_figure_supplement_5.pdf
- elife_poa_e05767_Figure_4_figure_supplement_1.pdf
- elife_poa_e05767_Figure_1_figure_supplement_7.pdf
- elife_poa_e05767_Figure_1_figure_supplement_6.pdf
- elife_poa_e05767_Figure_2_figure_supplement_1.pdf
- elife_poa_e05767_Figure_5_figure_supplement_2.pdf
- elife_poa_e05767_Figure_7_figure_supplement_1.pdf
- elife_poa_e05767_Figure_7_figure_supplement_2.pdf
