# Supplementary figures and images for: Lys63-linked ubiquitin chain adopts multiple conformational states for specific target recognition
Source: eLife journal article supplement (doi:10.7554/elife.05767), 2015-06-19

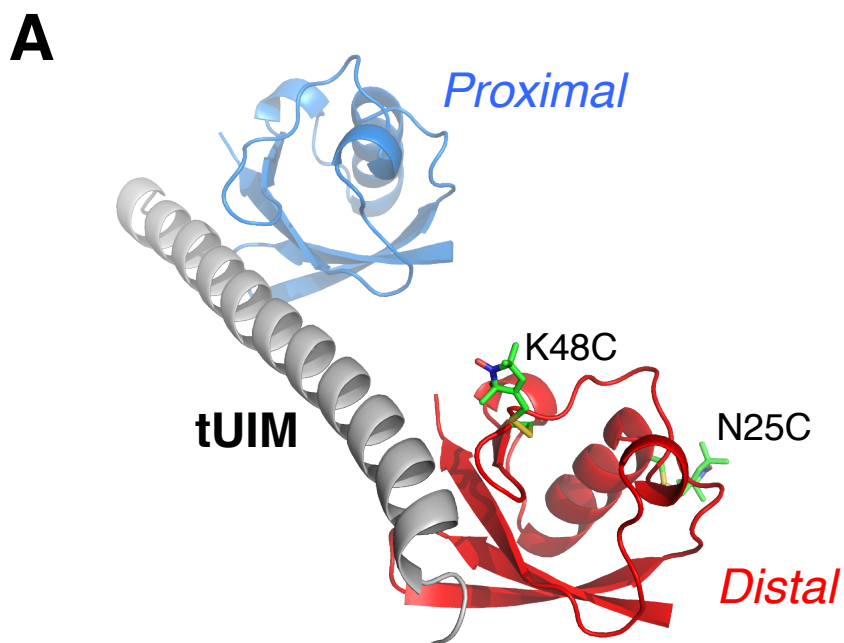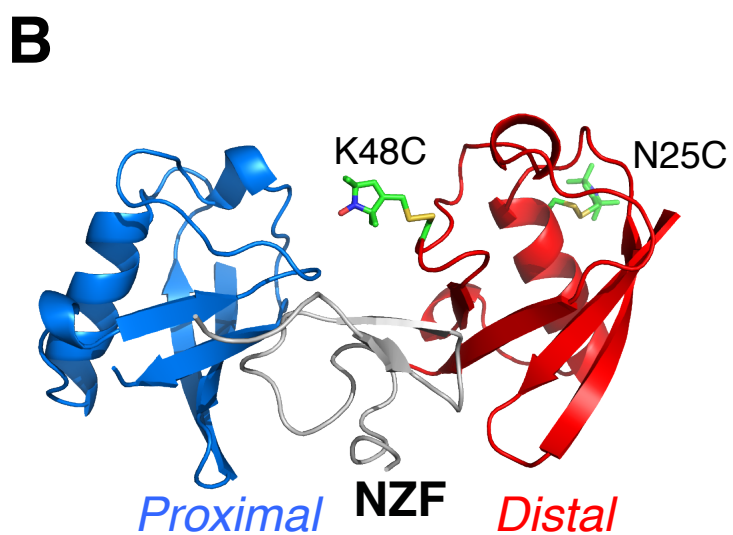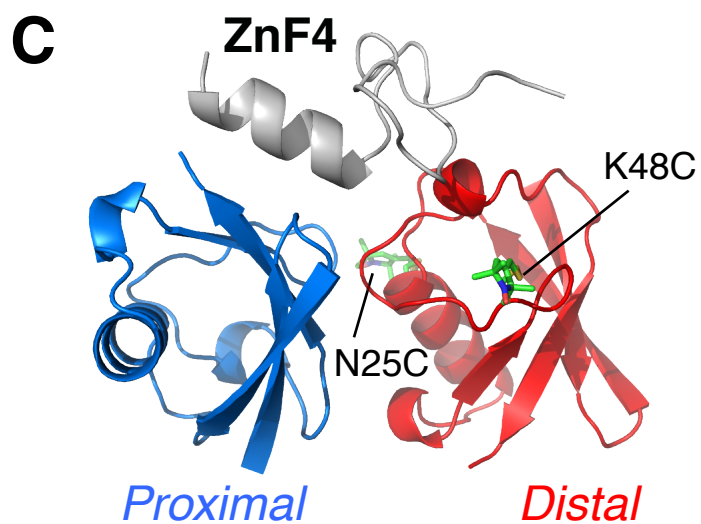

**Figure 1—figure supplement 2**

Supplement: supp [file elife-05767-supp-v1.zip]

**A**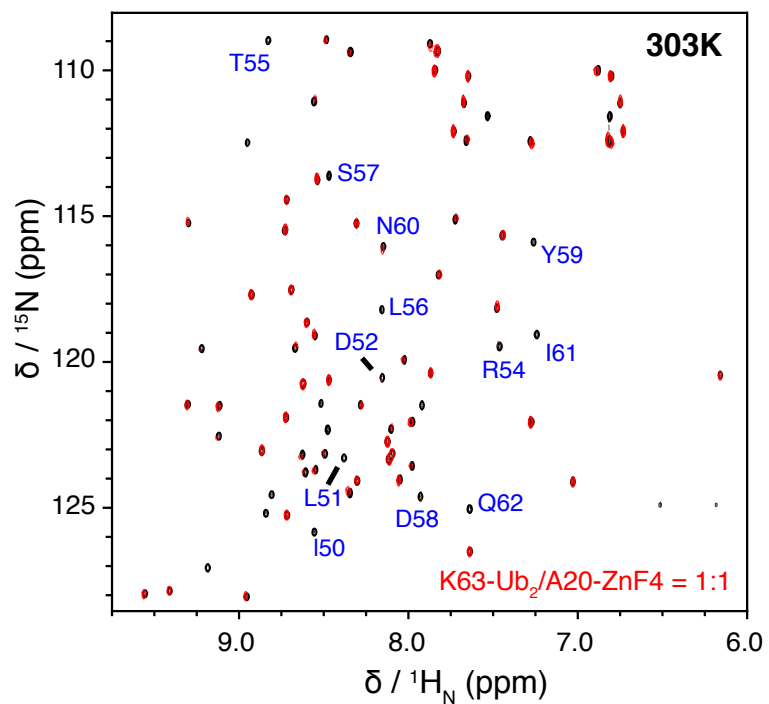**B**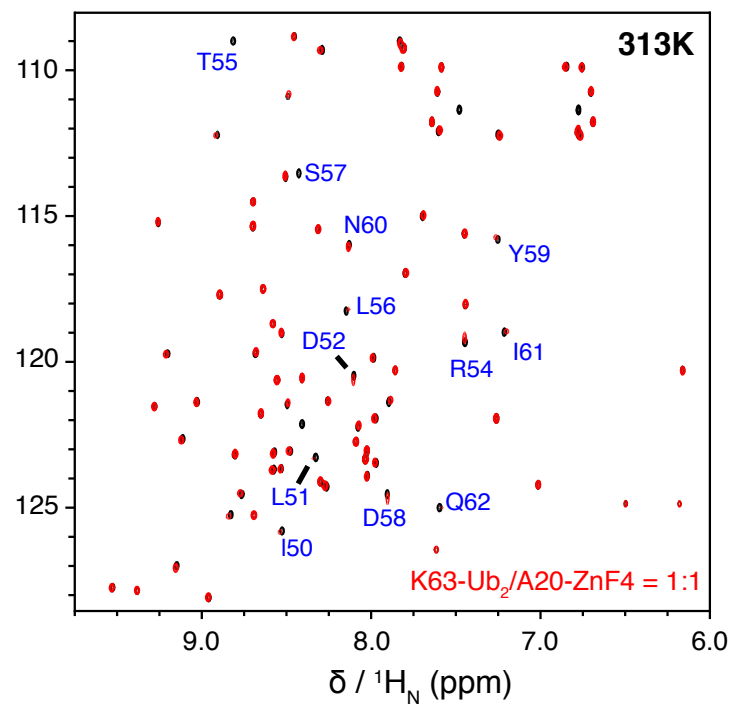

**Figure 7–figure supplement 2**

Supplement: supp [file elife-05767-supp-v1.zip]

**A**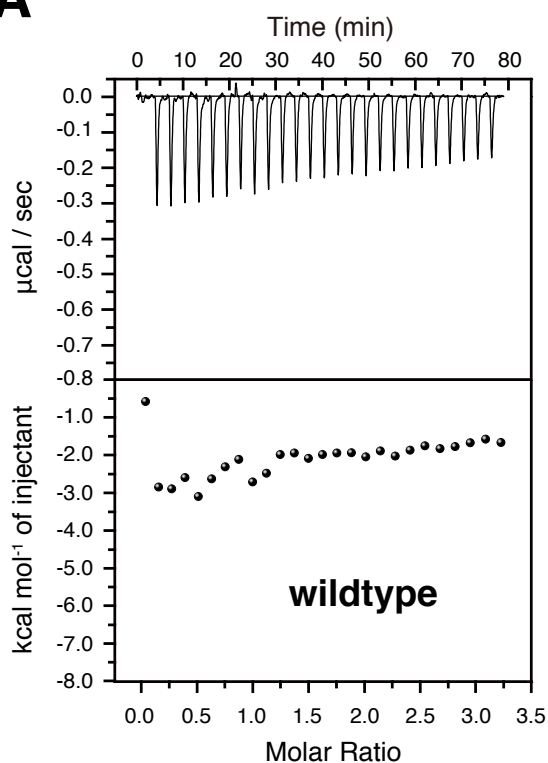**B**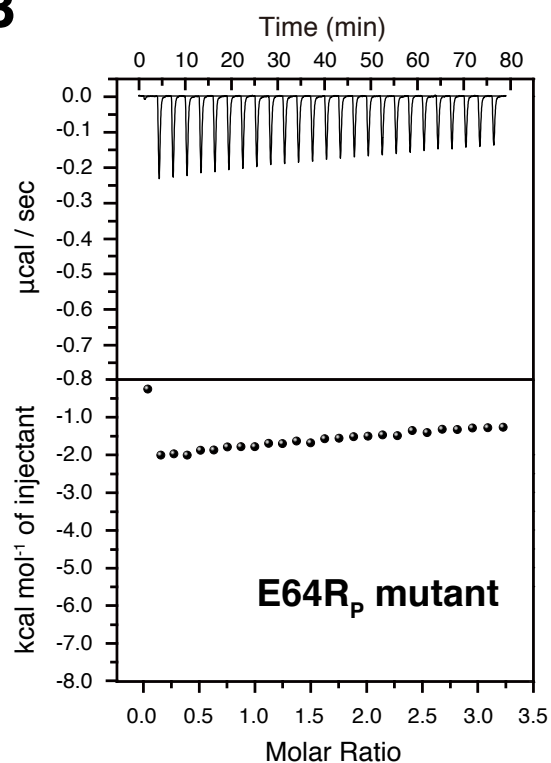

**Figure 7–figure supplement 1**

Supplement: supp [file elife-05767-supp-v1.zip]

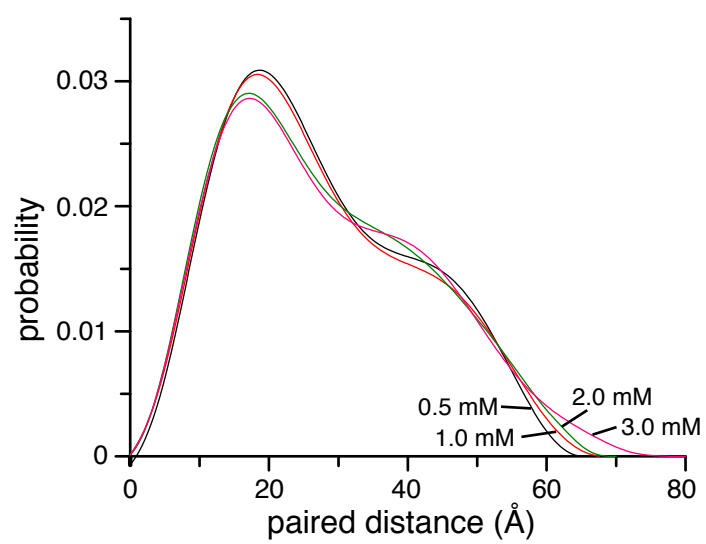

**Figure 2—figure supplement 1**

Supplement: supp [file elife-05767-supp-v1.zip]

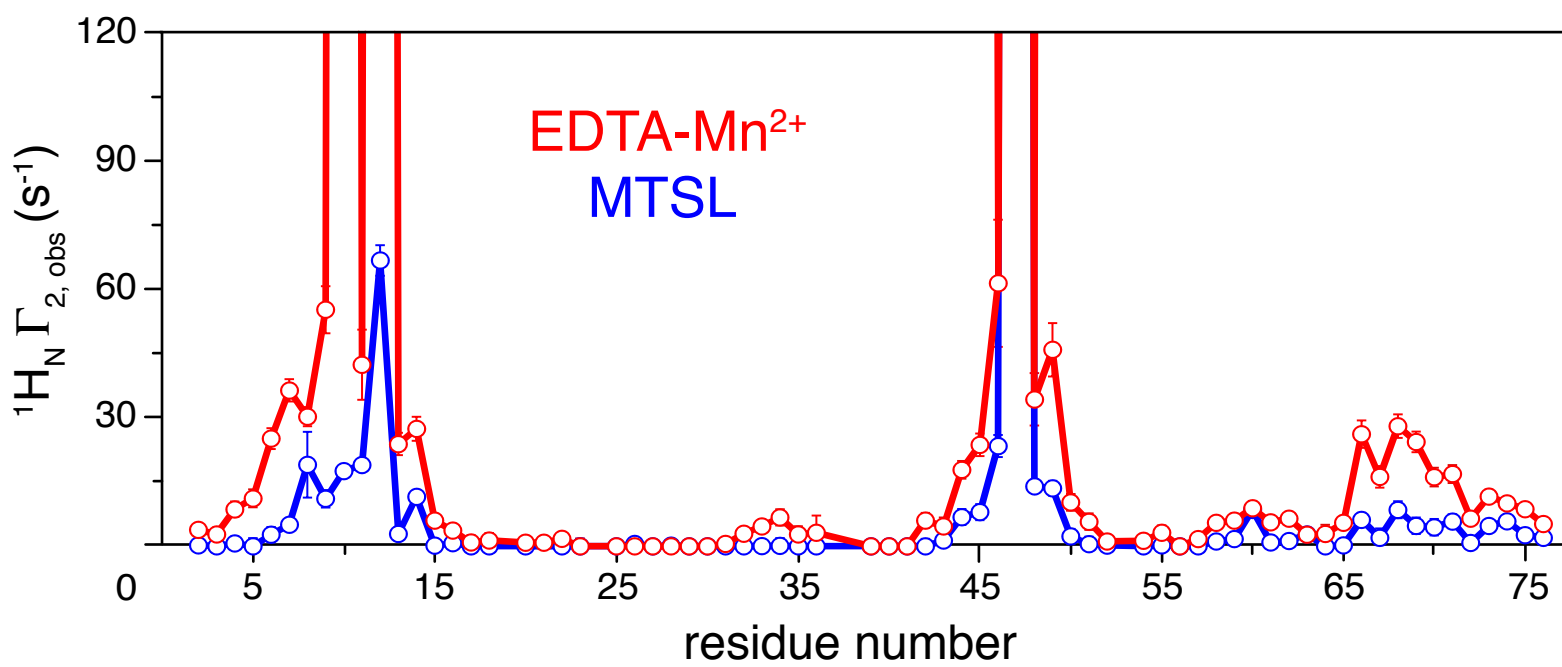

**Figure 1–figure supplement 6**

Supplement: supp [file elife-05767-supp-v1.zip]

**A**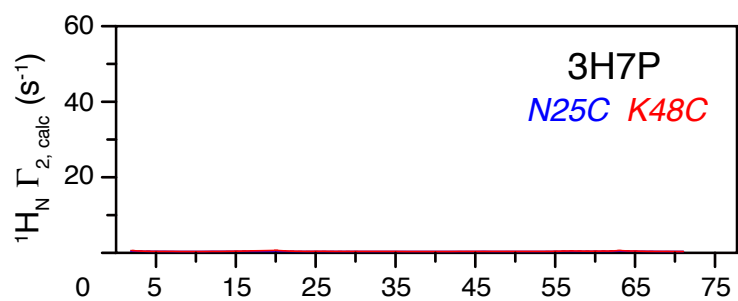**B**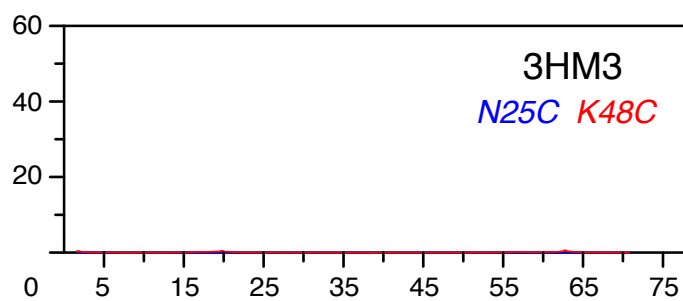**C**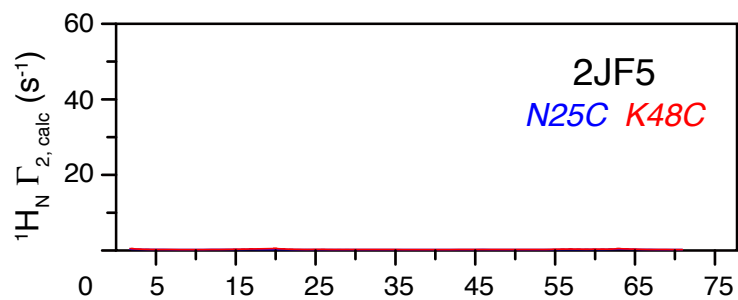**D**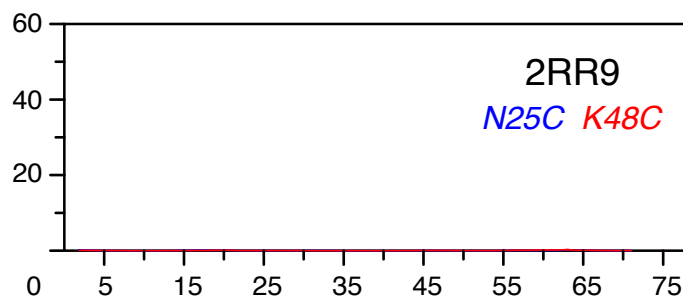**E**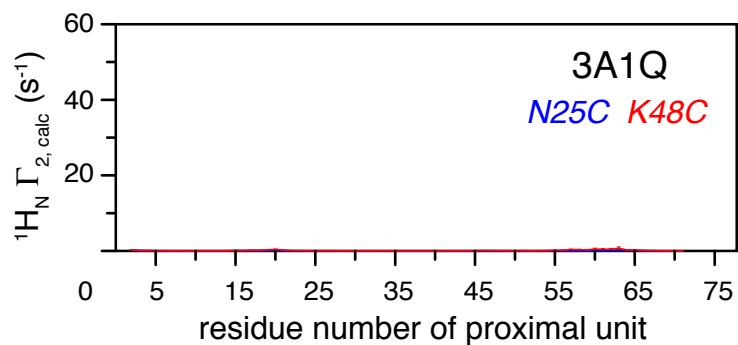**F**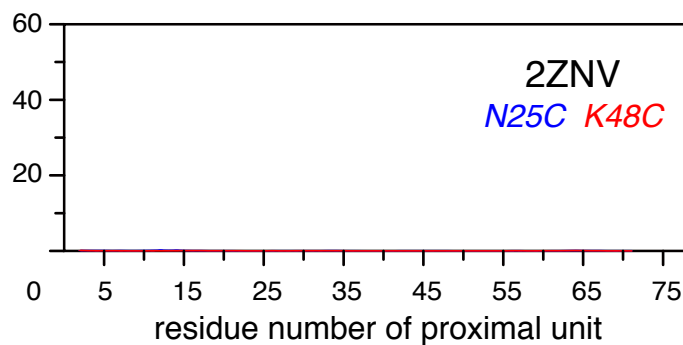

**Figure 1–figure supplement 8**

Supplement: supp [file elife-05767-supp-v1.zip › elife_poa_e05767_Figure_1_figure_supplement_8.pdf]

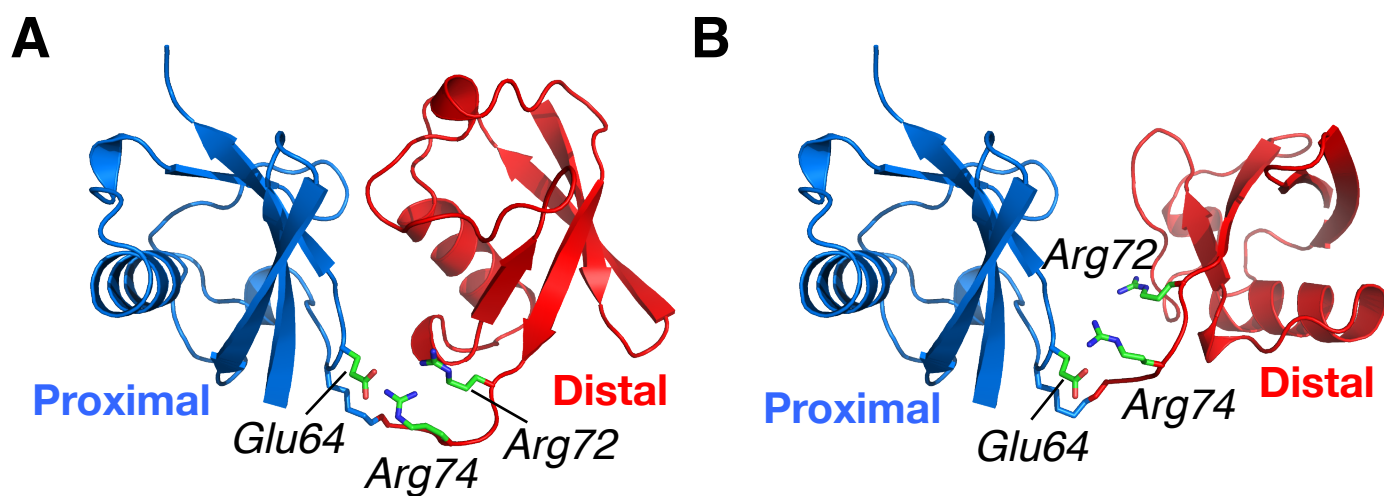

**Figure 5—figure supplement 1**

Supplement: supp [file elife-05767-supp-v1.zip › elife_poa_e05767_Figure_5_figure_supplement_1.pdf]

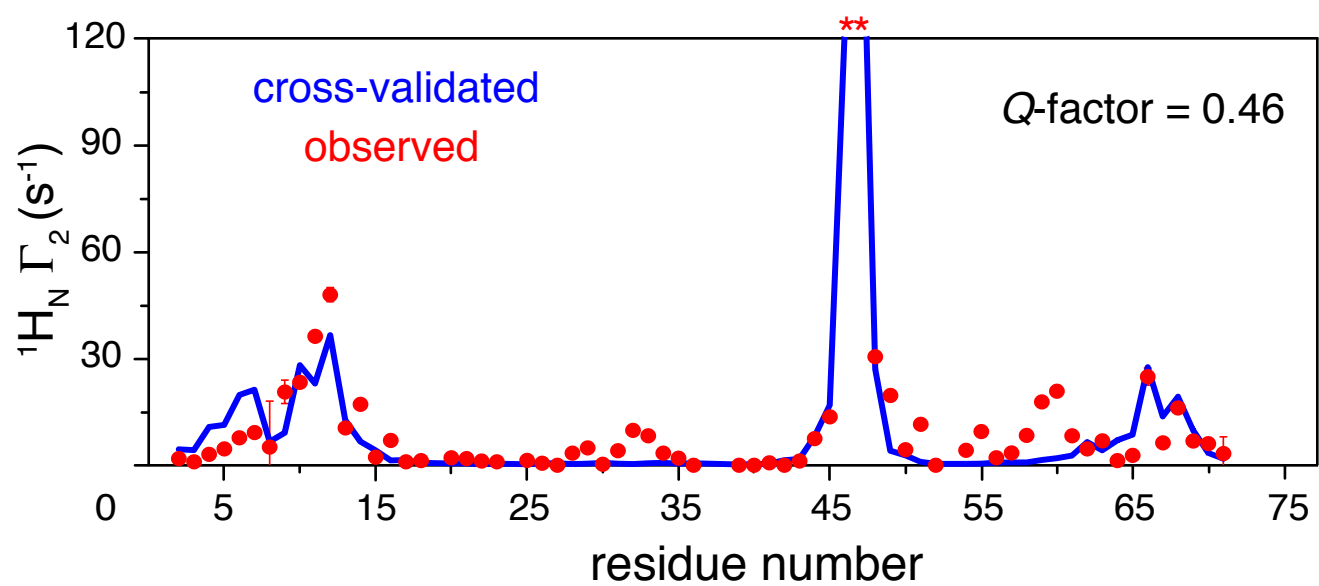

**Figure 3—figure supplement 1**

Supplement: supp [file elife-05767-supp-v1.zip › elife_poa_e05767_Figure_3_figure_supplement_1.pdf]

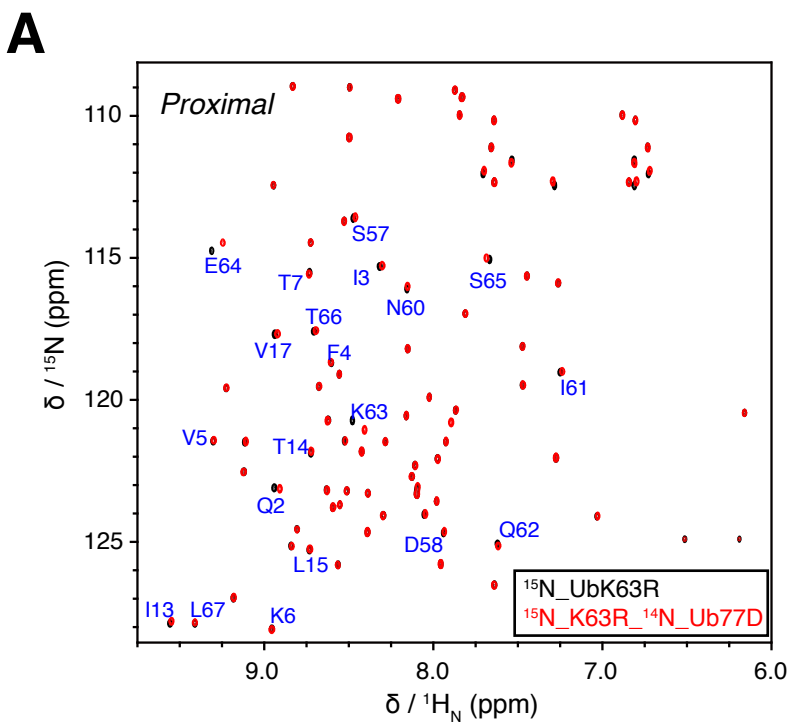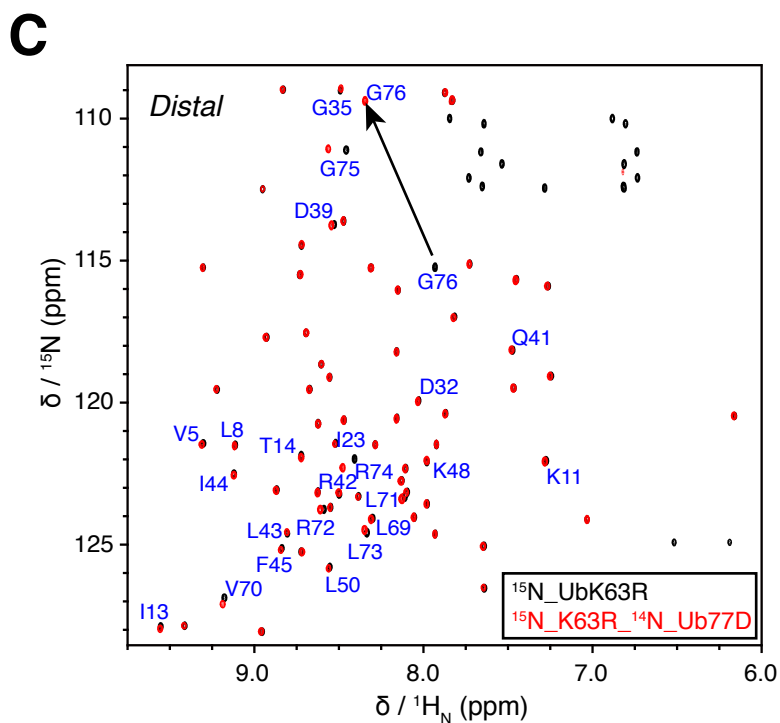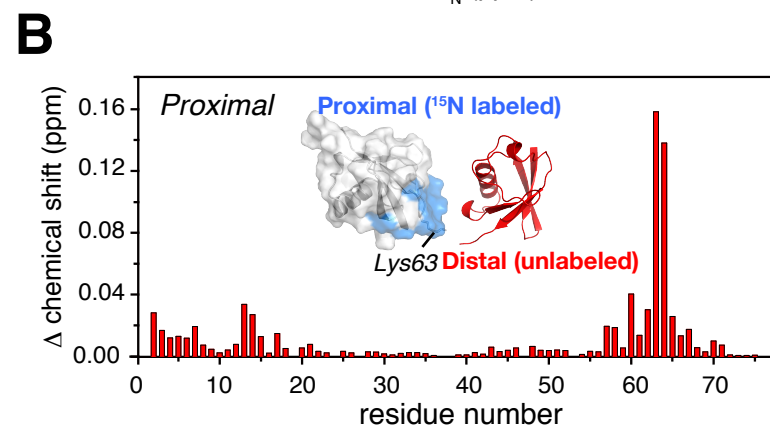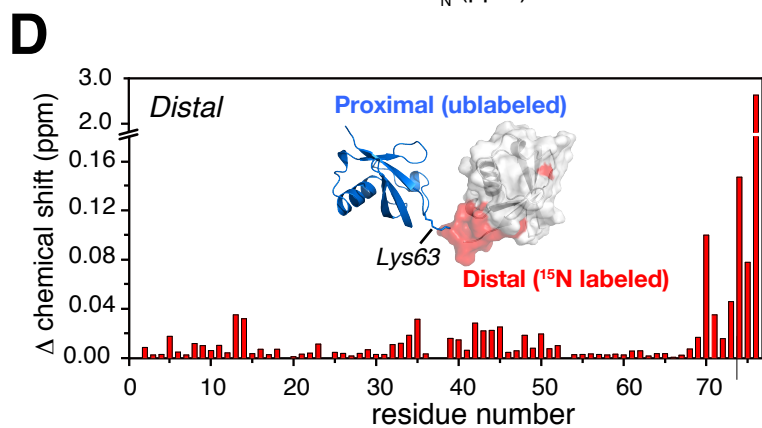

**Figure 1–figure supplement 1**

Supplement: supp [file elife-05767-supp-v1.zip › elife_poa_e05767_Figure_1_figure_supplement_1.pdf]

**A**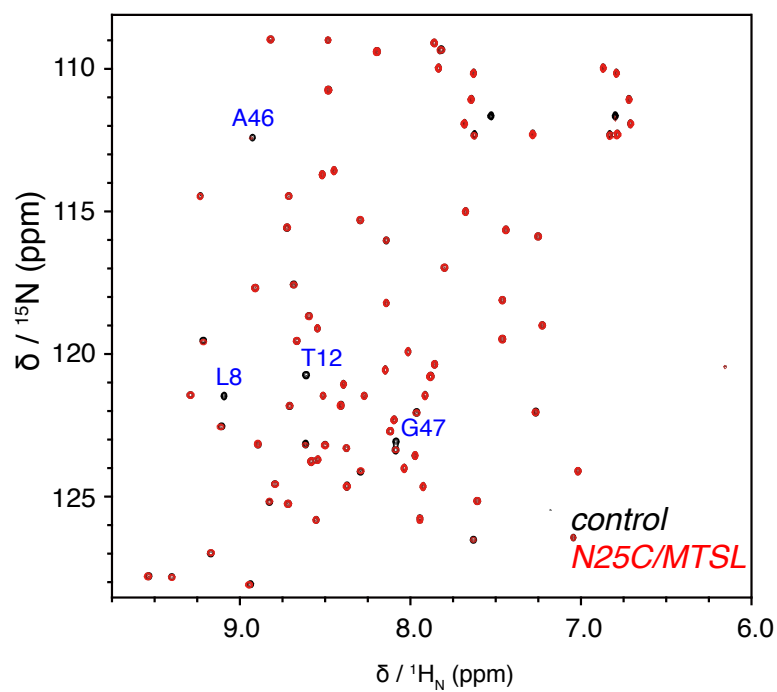**B**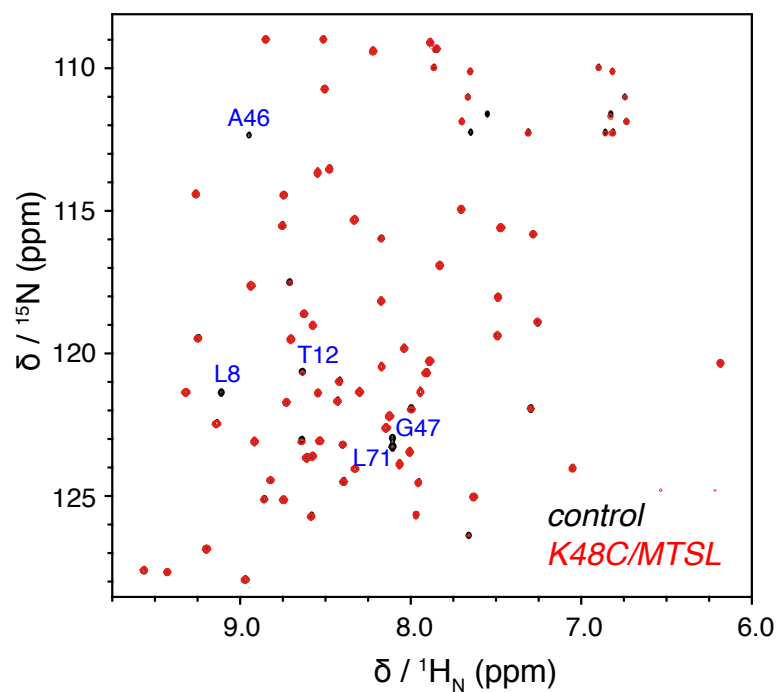

**Figure 1–figure supplement 4**

Supplement: supp [file elife-05767-supp-v1.zip › elife_poa_e05767_Figure_1_figure_supplement_4.pdf]

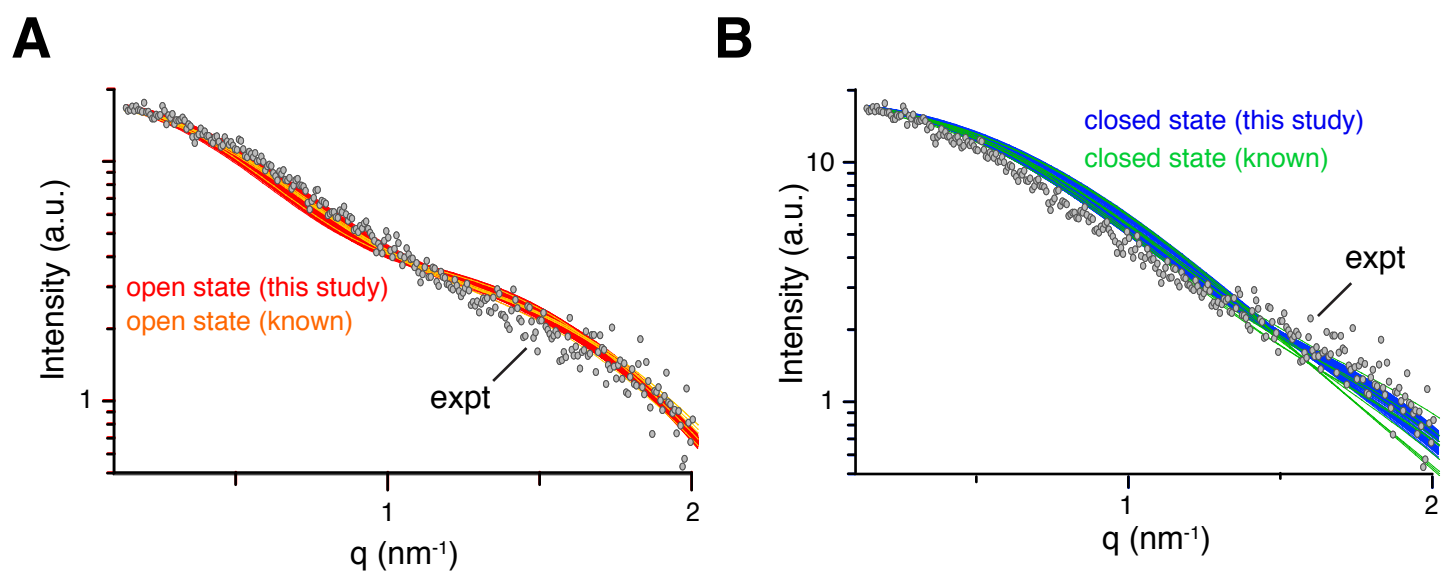

**Figure 2–figure supplement 2**

Supplement: supp [file elife-05767-supp-v1.zip › elife_poa_e05767_Figure_2_figure_supplement_2.pdf]

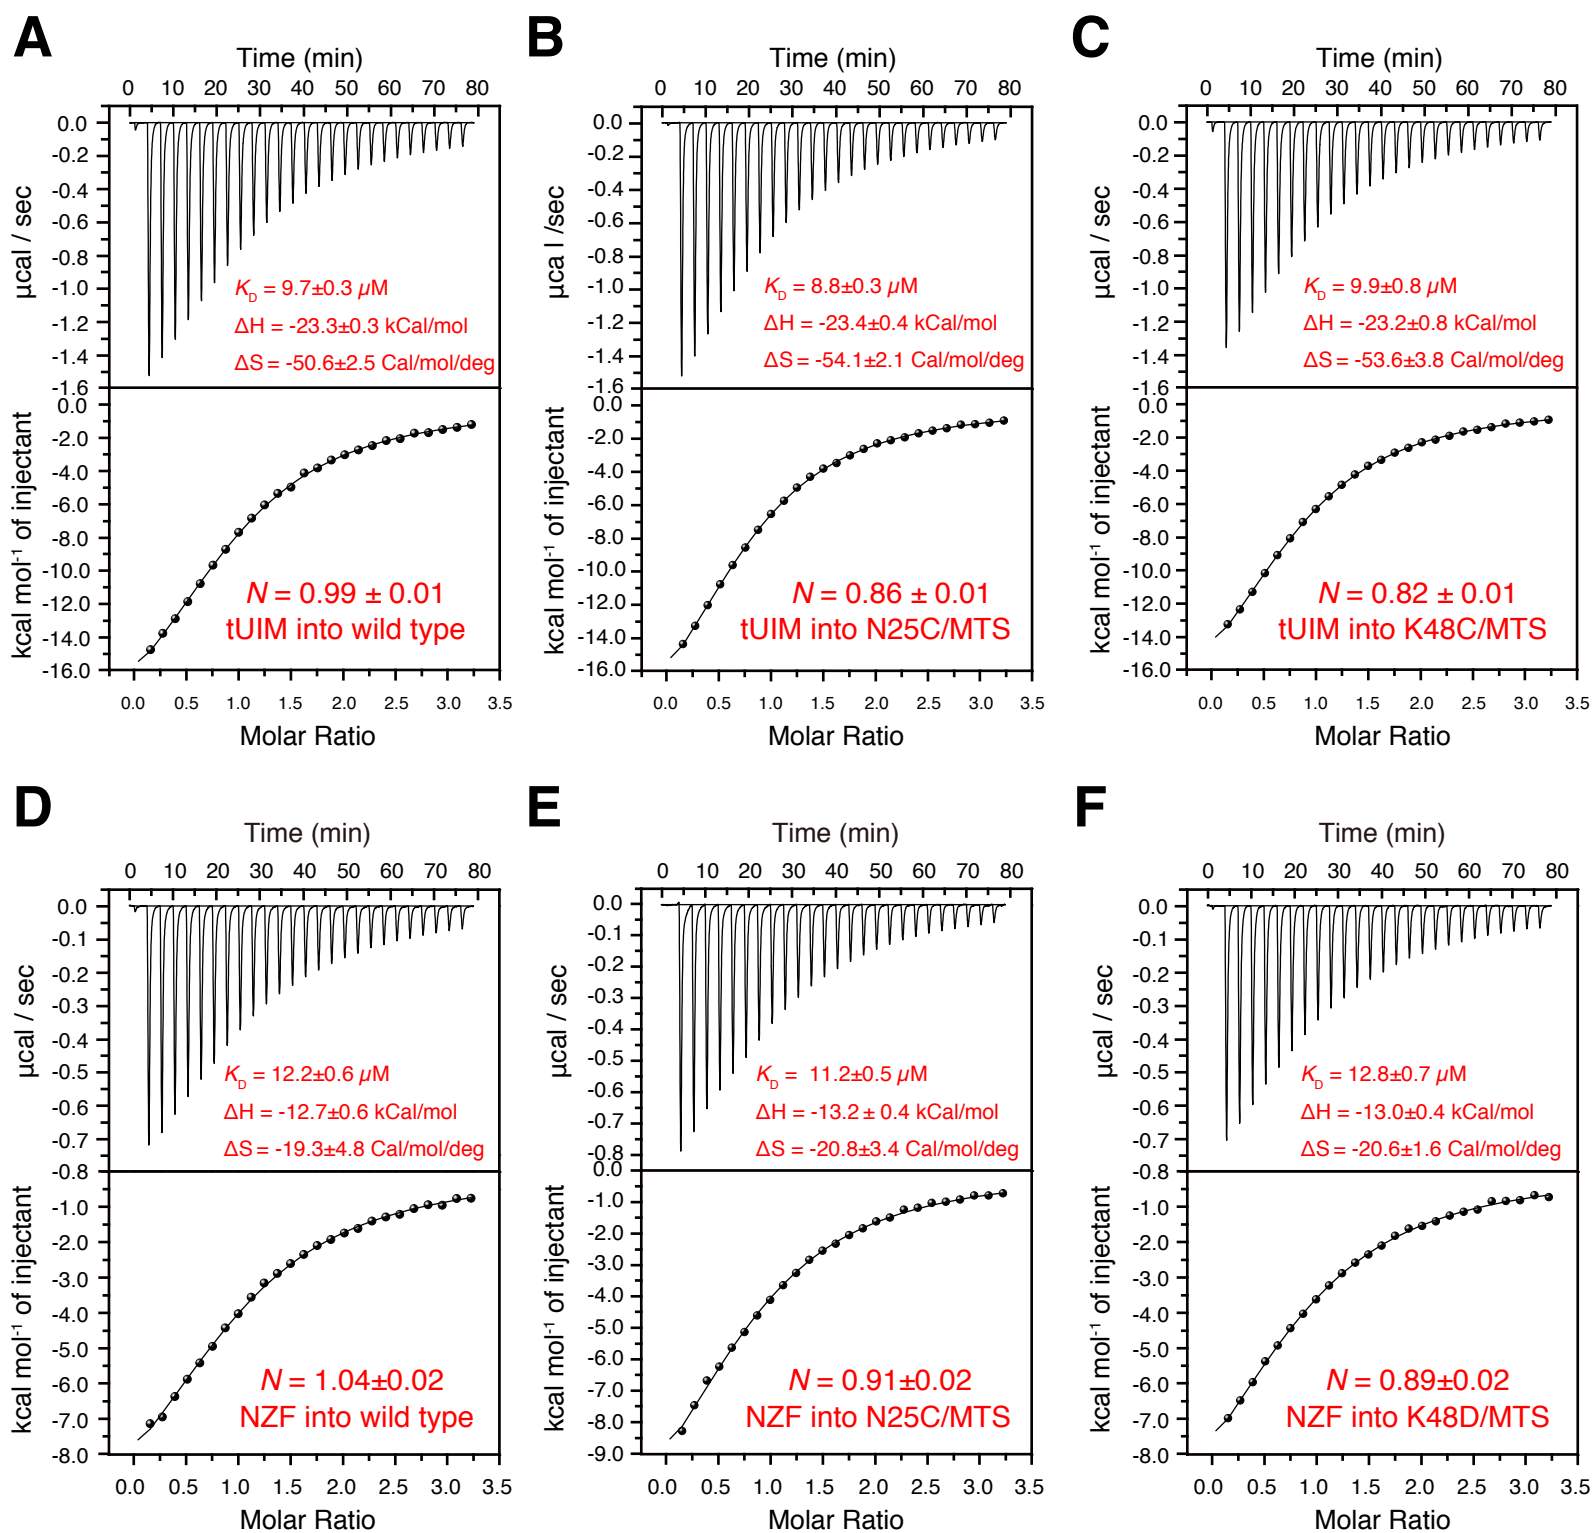

**Figure 1—figure supplement 3**

Supplement: supp [file elife-05767-supp-v1.zip › elife_poa_e05767_Figure_1_figure_supplement_3.pdf]

**A**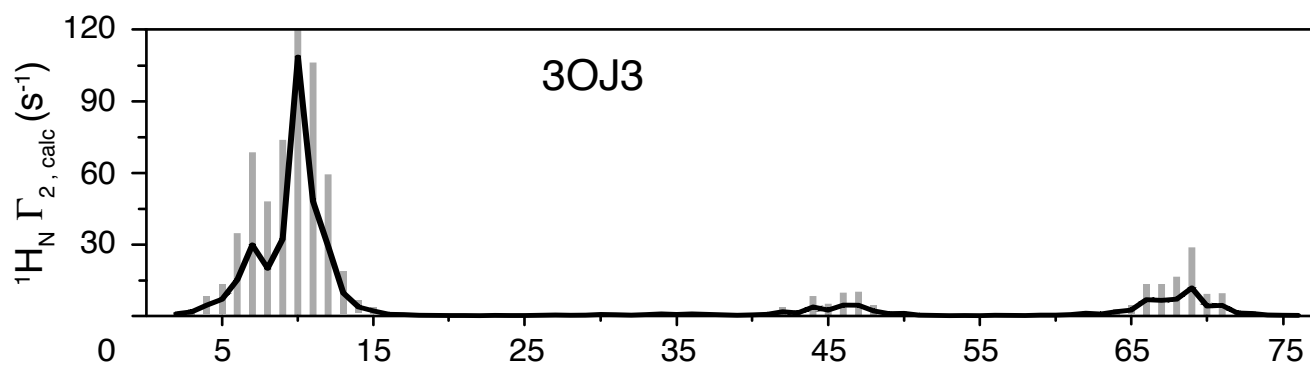**B**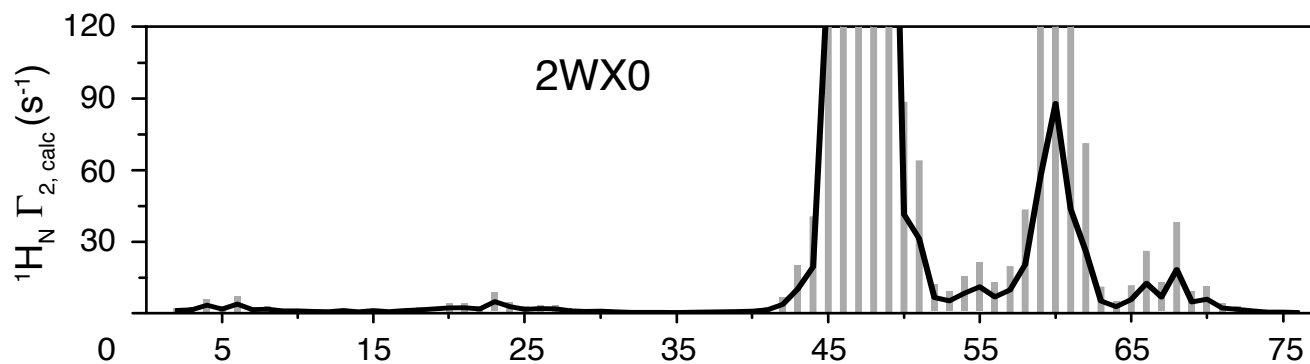**C**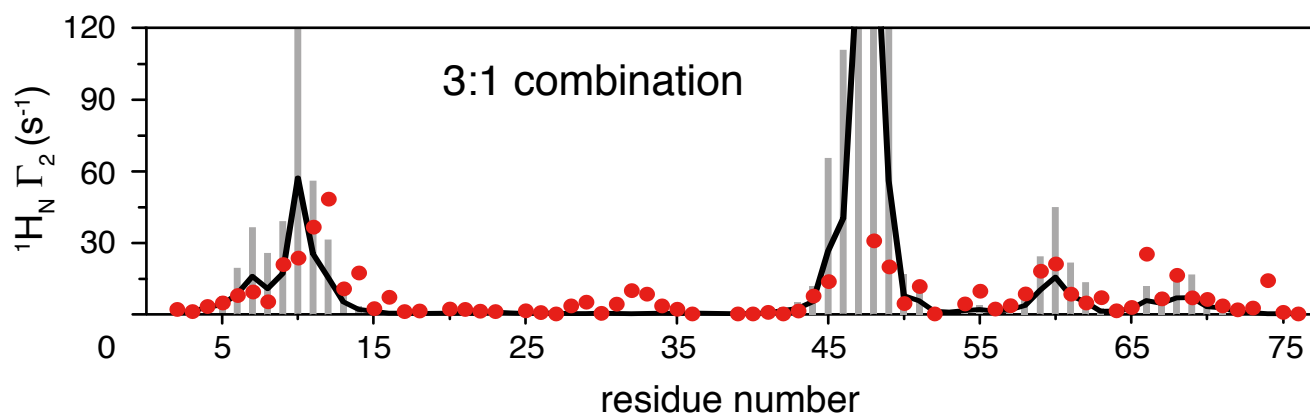

**Figure 4–figure supplement 2**

Supplement: supp [file elife-05767-supp-v1.zip › elife_poa_e05767_Figure_4_figure_supplement_2.pdf]

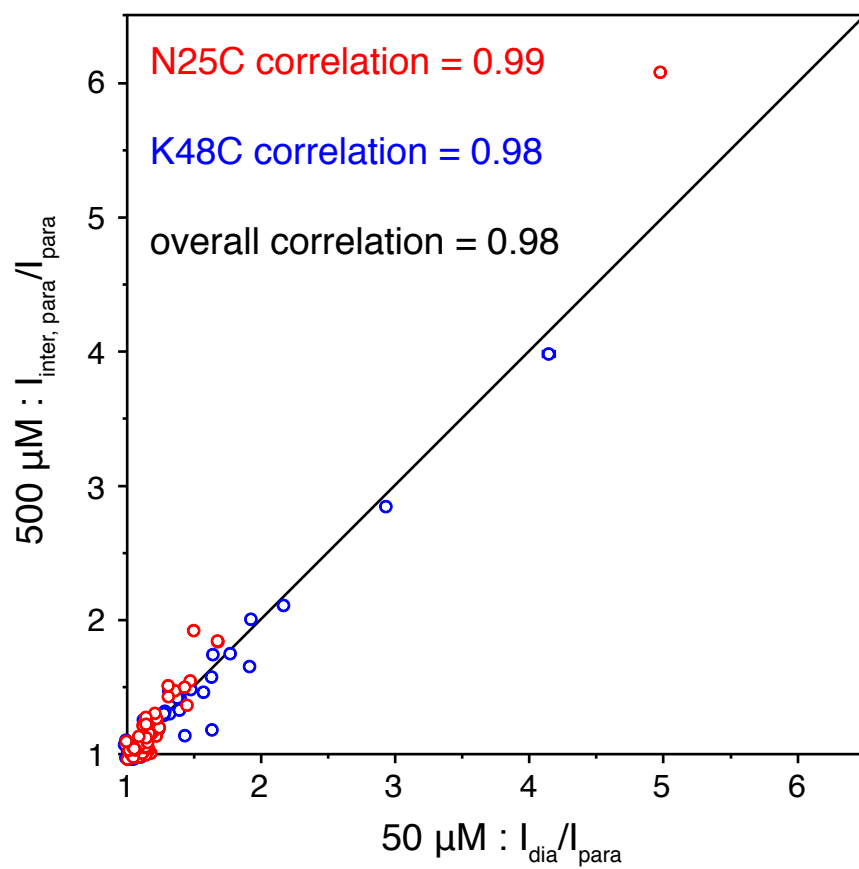

**Figure 1–figure supplement 5**

Supplement: supp [file elife-05767-supp-v1.zip › elife_poa_e05767_Figure_1_figure_supplement_5.pdf]

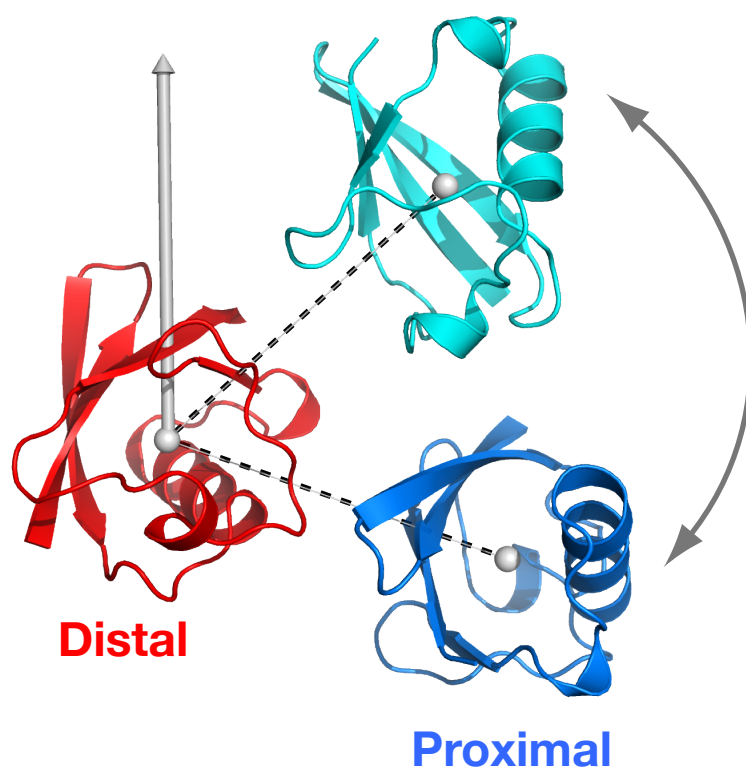

**Figure 4—figure supplement 1**

Supplement: supp [file elife-05767-supp-v1.zip › elife_poa_e05767_Figure_4_figure_supplement_1.pdf]

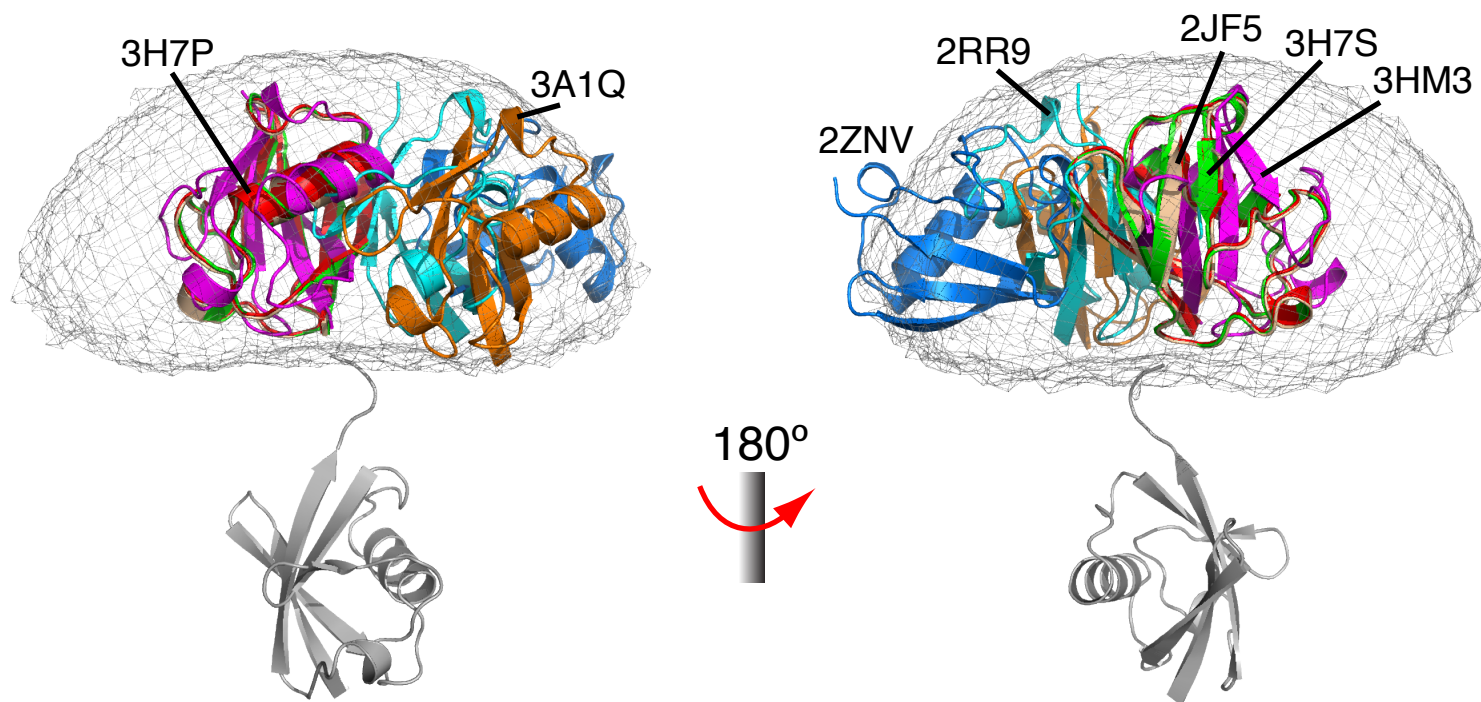

**Figure 1–figure supplement 7**

Supplement: supp [file elife-05767-supp-v1.zip › elife_poa_e05767_Figure_1_figure_supplement_7.pdf]

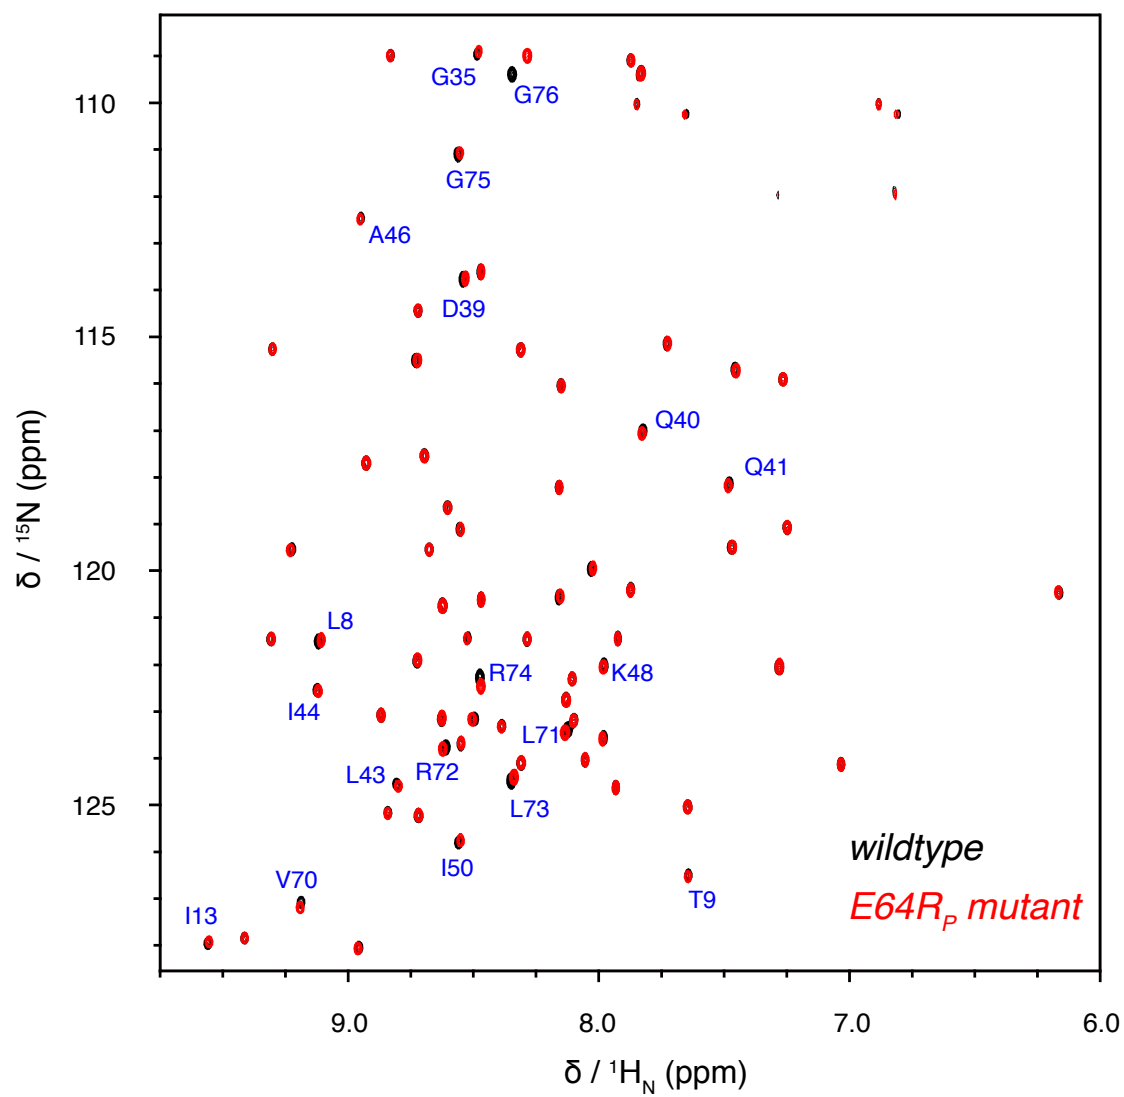

**Figure 5–figure supplement 2**

Supplement: supp [file elife-05767-supp-v1.zip › elife_poa_e05767_Figure_5_figure_supplement_2.pdf]
